# Supplementary material for: Photothermal effects from Au–Cu2O core–shell nanocubes, octahedra, and nanobars with broad near-infrared absorption tunability
Source: Royal Society of Chemistry journal article supplement (doi:10.1039/c5nr06847a), 2015-11-26
Supplement: c5nr06847a1.pdf [file c5nr06847a1.pdf]

Electronic Supplementary Information

**Photothermal Effects from Au–Cu<sub>2</sub>O Core–Shell Nanocubes, Octahedra, and Nanobars with Broad Near-Infrared Absorption Tunability**

Hsiang-Ju Wang, Kung-Hsun Yang, Shih-Chen Hsu, and Michael H. Huang\*

Department of Chemistry, National Tsing Hua University, Hsinchu 30013, Taiwan

**Synthesis of Octahedral Gold Nanocrystals**

The octahedral Au nanocrystals were obtained following a hydrothermal method developed in our laboratory.<sup>21</sup> For the synthesis of 41 and 57 nm Au octahedra, 0.55 g of CTAB was dissolved in 97.0 and 95.5 mL of deionized water, followed by the introduction of 2.5 and 4.0 mL of 0.01 M HAuCl<sub>4</sub> solution, respectively. Finally, 0.5 mL of 0.1 M trisodium citrate solution was added. The total volume in the glass bottle is 100 mL. The glass bottle was then sealed by a Teflon bolt with an O-ring, and the bolt was wrapped with a polyimide tape to prevent leakage of steam. After sealing tightly, the bottle was put into an oven set at 110 °C for 12 and 16 h to yield 41- and 57-nm Au octahedra, respectively. After nanocrystal synthesis, the solution was centrifuged at 6000 rpm for 10 min. After removing the top solution containing CTAB, the particles were dispersed in 1 mL of deionized water. The concentration of Au octahedra (number of particles/mL) was determined by ICP mass spectroscopy using a known amount of Au particle solution. Assuming a perfect octahedral shape, the concentration of 41-nm Au cores is  $1.17 \times 10^{13}/\text{mL}$ , and  $9 \times 10^{12}/\text{mL}$  for 57-nm Au cores.

**Synthesis of Au Nanorods**

Au nanorods were prepared by first dissolving 0.36 g of CTAB surfactant in 9.3 mL of deionized water, and then 0.25 mL of 0.01 M HAuCl<sub>4</sub> solution and 0.45 mL of 0.02 M ice-cold NaBH<sub>4</sub> solution were added with stirring in a 20-mL glass bottle. The solution was aged for 1 h at 30 °C to decompose excess NaBH<sub>4</sub>. The solution turned brown immediately, indicating the formation of Au seed nanoparticles.

The growth solution was prepared by dissolving 1.8 g of CTAB in 50 mL of deionized water in a flask, and then 2.5 mL of 0.01 M HAuCl<sub>4</sub> solution was added. To make Au nanorods with slightly different aspect ratios, 300, 450, 500, or 650  $\mu\text{L}$  of 0.01 M AgNO<sub>3</sub> solution was introduced. Next, 1 mL of 1.0 M HCl solution and 0.4 mL of 0.1 M ascorbic acid were added. The solution turned colorless after adding ascorbic acid, indicating the reduction of Au<sup>3+</sup> to Au<sup>+</sup> species. Finally, 0.15 mL of the Au seed solution was added. The solution was stirred for 2 h at 30 °C, and centrifuged at 9000 rpm for 10 min. After removal of the top solution containing surfactant, 35 mL of deionized water was added and the solution was centrifuged again. After removing the solution, the nanorods were dispersed in 5 mL of

deionized water.

### Synthesis of Au–Cu<sub>2</sub>O Core–Shell Truncated Nanobars

To make Au–Cu<sub>2</sub>O truncated nanobars with different sizes, 0.05 mL of 0.1 M CuCl<sub>2</sub> solution was first added to 9.275, 9.225, 9.175, and 9.125 mL of deionized water in each bottle, and then 0.05, 0.1, 0.15, and 0.2 mL of the Au nanorod solution were respectively introduced. Next, 0.087 g of SDS powder was added with vigorous stirring until complete dissolution, followed by the addition of 0.5 mL of 0.2 M NH<sub>2</sub>OH·HCl solution. After stirring for 10 sec, 0.25 mL of 1.0 M NaOH was injected and the bottle was stirred for 20 sec. The solution was aged for 2 h at 30 °C for shell growth. The total solution volume in each bottle is 10 mL. Copper ion and SDS concentrations are  $5.0 \times 10^{-4}$  and  $3.0 \times 10^{-2}$  M, respectively. To collect the truncated nanobars, the same centrifugation and washing steps were used.

**Table S1** Amounts of reagents used in the growth of Au–Cu<sub>2</sub>O core–shell nanocubes and octahedra from 41- and 57-nm octahedral Au cores.

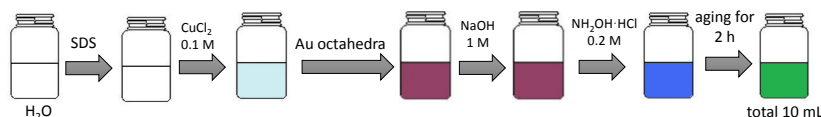

| sample      | water   | SDS     | CuCl <sub>2</sub><br>(0.1 M) | Au octahedra<br>(41 nm) | NaOH<br>(1.0 M) | NH <sub>2</sub> OH·HCl<br>(0.2 M) |
|-------------|---------|---------|------------------------------|-------------------------|-----------------|-----------------------------------|
| Oh-41-89    | 7.9 mL  | 0.087 g | 0.1 mL                       | 0.09 mL                 | 0.25 mL         | 0.85 mL                           |
| Oh-41-157   | 25.5 mL | 0.261 g | 0.3 mL                       |                         | 0.75 mL         | 2.55 mL                           |
| Cube-41-73  | 8.65 mL | 0.087 g | 0.1 mL                       |                         | 0.25 mL         | 0.15 mL                           |
| Cube-41-108 | 27.6 mL | 0.261 g | 0.3 mL                       |                         | 0.75 mL         | 0.45 mL                           |

| sample      | water    | SDS     | CuCl <sub>2</sub><br>(0.1 M) | Au octahedra<br>(57 nm) | NaOH<br>(1.0 M) | NH <sub>2</sub> OH·HCl<br>(0.2 M) |
|-------------|----------|---------|------------------------------|-------------------------|-----------------|-----------------------------------|
| Oh-57-105   | 8.836 mL | 0.087 g | 0.041 mL                     | 0.023 mL                | 0.25 mL         | 0.85 mL                           |
| Oh-57-162   | 8.663 mL |         | 0.214 mL                     |                         |                 |                                   |
| Cube-57-87  | 9.557 mL |         | 0.06 mL                      |                         |                 | 0.15 mL                           |
| Cube-57-118 | 9.433 mL |         | 0.184 mL                     |                         |                 |                                   |

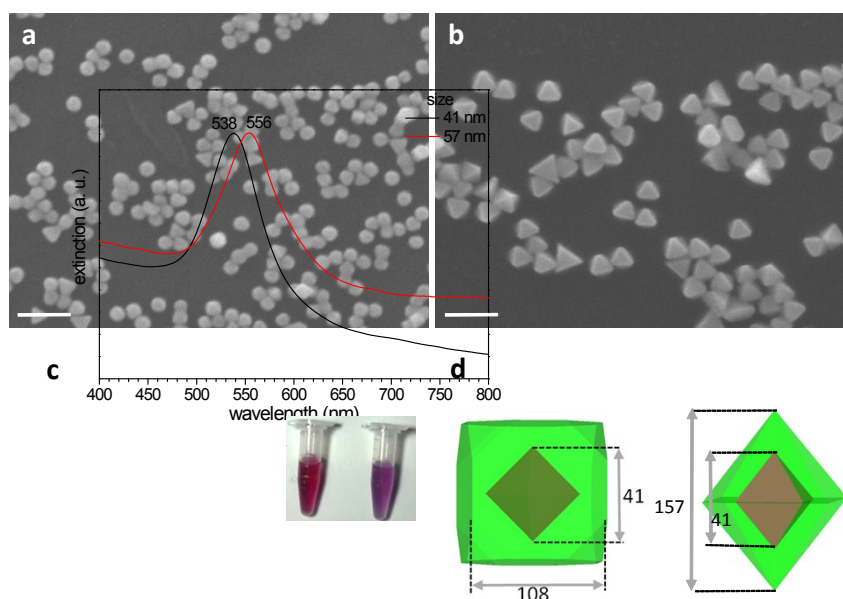

**Fig. S1** SEM images of octahedral Au nanocrystals with sizes of (a) 41 and (b) 57 nm. (c) UV-vis spectra of the octahedral Au nanocrystals and a photograph of the solutions. The right sample contains 57-nm octahedra, while the left sample contains 41-nm octahedra. (d) Illustrations of Au-Cu<sub>2</sub>O cube and octahedron with their measured dimensions.

**Table S2** Average sizes and size distributions of the synthesized Au-Cu<sub>2</sub>O core-shell cubes and octahedra.

*Core size: 41 nm*

| shape     | size (nm) | coefficient of variation (%) |
|-----------|-----------|------------------------------|
| octahedra | 157 ± 19  | 12                           |
|           | 89 ± 9    | 10                           |
| cubes     | 108 ± 9   | 8                            |
|           | 73 ± 6    | 9                            |

*Core size: 57 nm*

| shape     | size (nm) | coefficient of variation (%) |
|-----------|-----------|------------------------------|
| octahedra | 162 ± 19  | 12                           |
|           | 105 ± 14  | 13                           |
| cubes     | 118 ± 16  | 14                           |
|           | 87 ± 9    | 10                           |

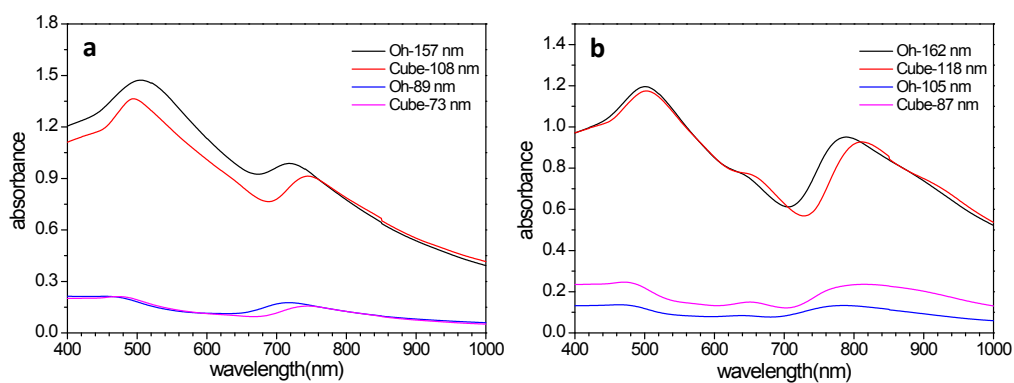

**Fig. S2** UV-vis spectra of the various Au-Cu<sub>2</sub>O nanocrystal samples using (a) 41-nm and (b) 57-nm Au cores. The actual absorbance values recorded are shown. Larger particle give much higher extinction values.

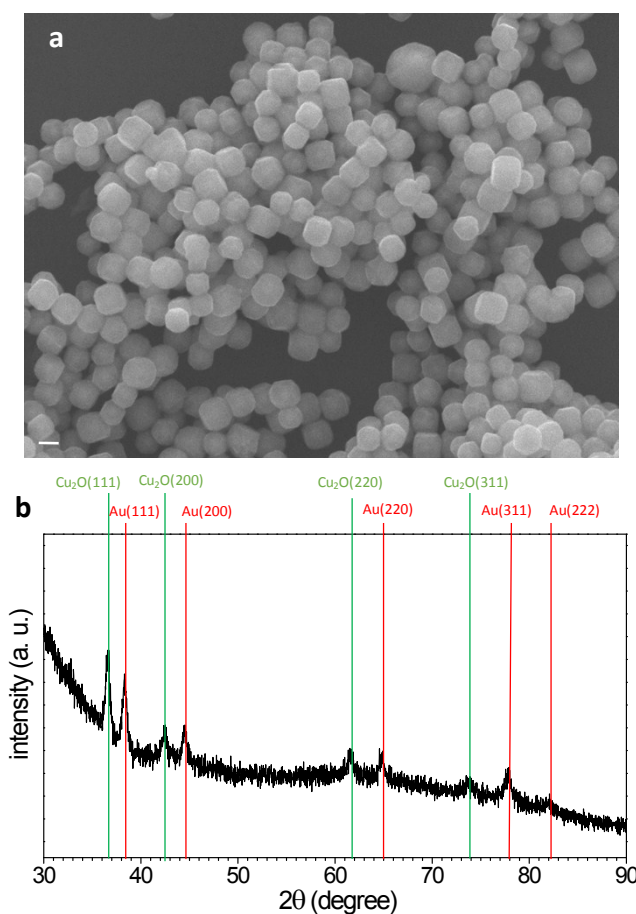

**Fig. S3** (a) SEM image and (b) XRD pattern of 118-nm Au-Cu<sub>2</sub>O nanocubes after 6 cycles of photothermal treatment. Scale bar is equal to 100 nm.

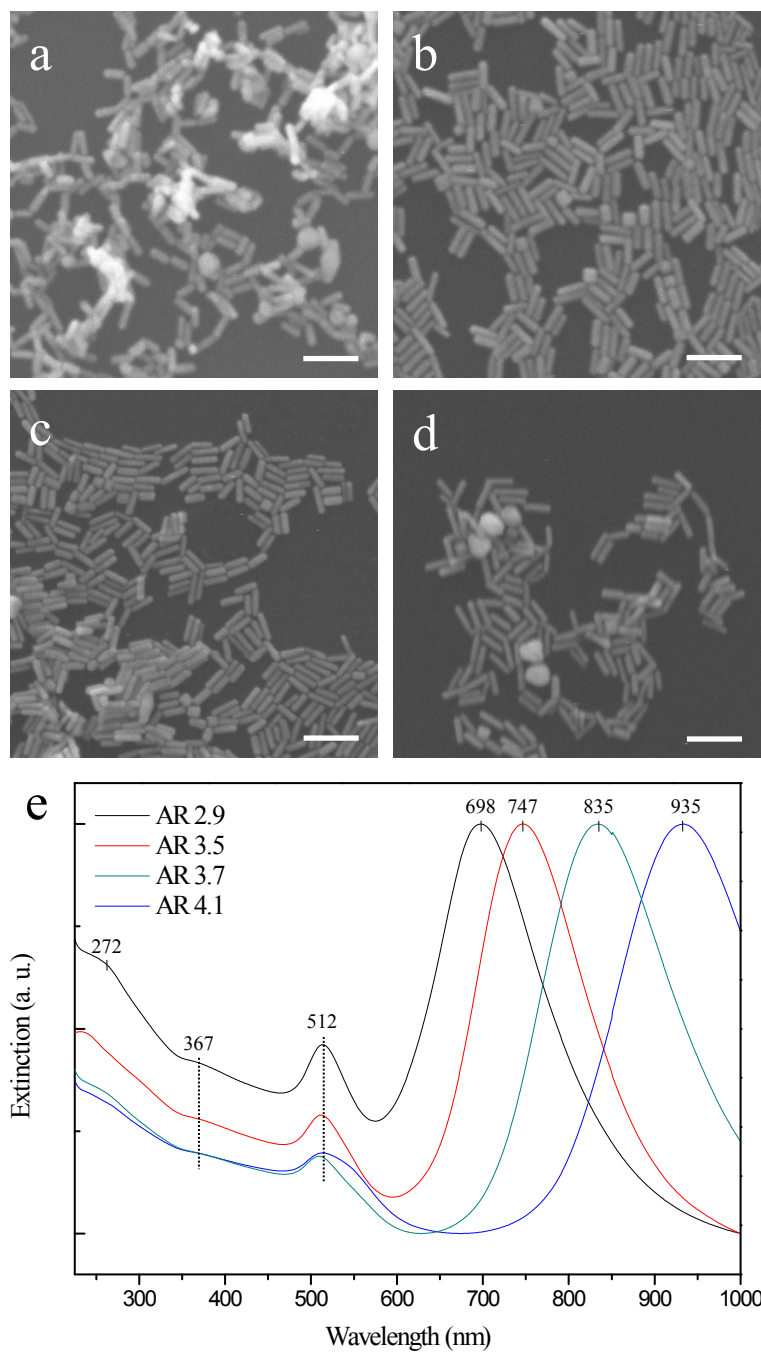

**Fig. S4** (a–d) SEM images of Au nanorods with average aspect ratios of (a) 2.9, (b) 3.5, (c) 3.7, and (d) 4.1. Scale bars are 100 nm. (e) UV–vis spectra of these Au nanorods.

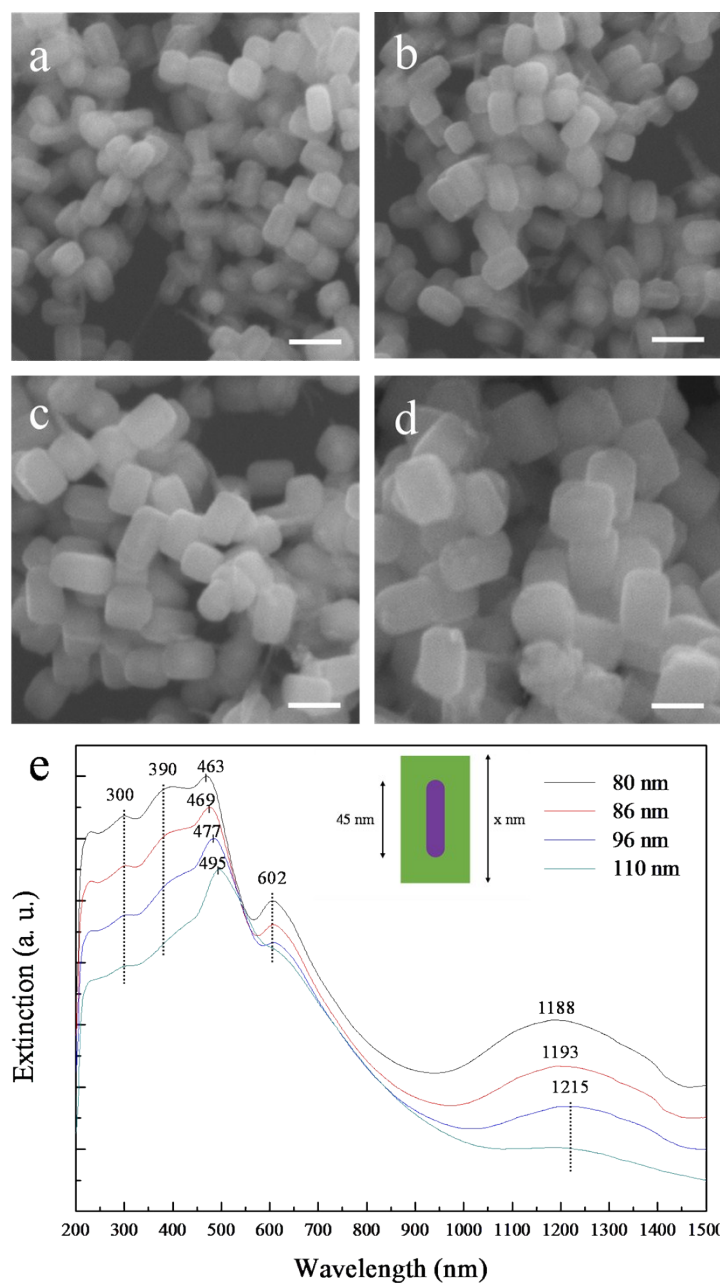

**Fig. S5** (a–d) SEM images of Au–Cu<sub>2</sub>O rectangular nanobars with dimensions of (a) 80 nm × 51 nm, (b) 86 nm × 56 nm, (c) 96 nm × 65 nm, and (d) 110 nm × 83 nm synthesized from Au nanorods with an average aspect ratio of 3.5. Scale bar are 100 nm. (e) UV–vis–NIR spectra of the Au–Cu<sub>2</sub>O nanobars. A drawing of the particle is provided showing the core length.

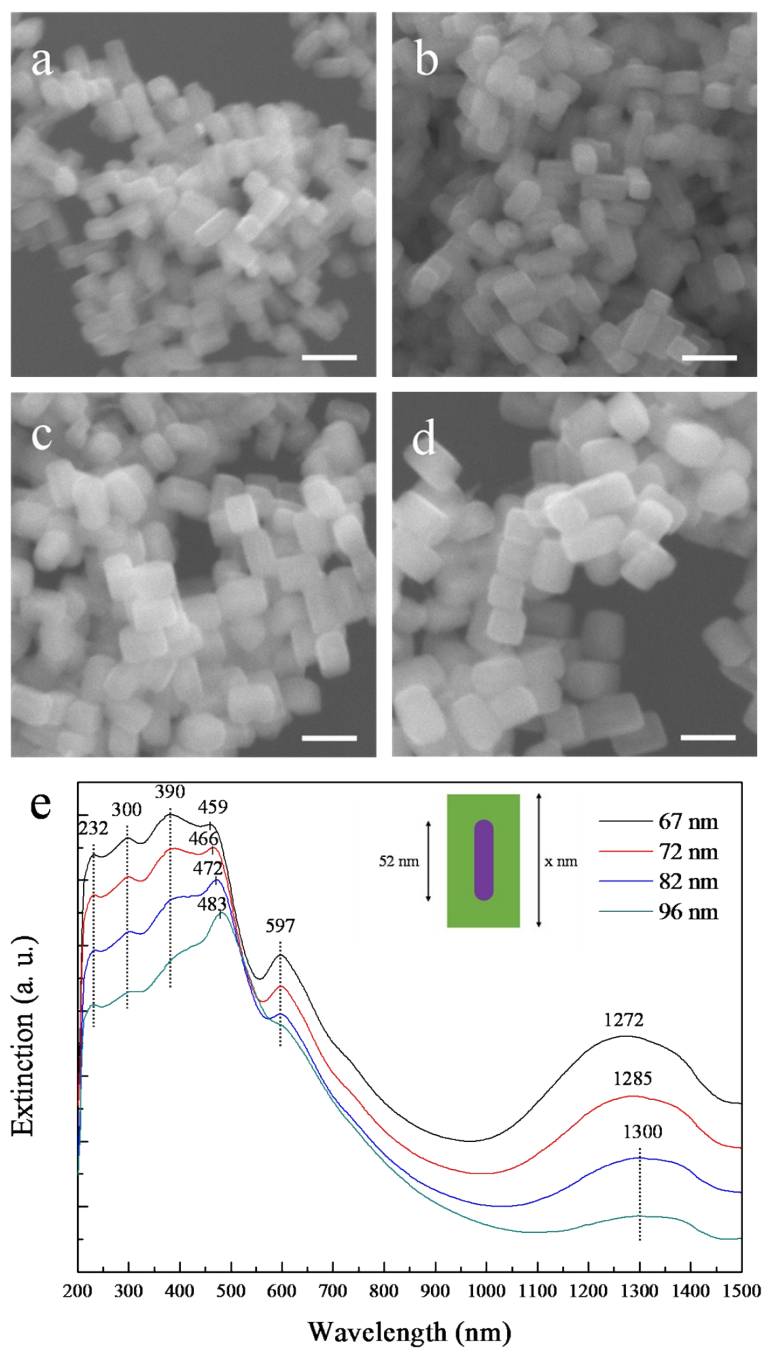

**Fig. S6.** (a–d) SEM images of Au–Cu<sub>2</sub>O rectangular nanobars with dimensions of (a) 67 nm × 38 nm, (b) 72 nm × 41 nm, (c) 82 nm × 52 nm, and (d) 96 nm × 63 nm synthesized from Au nanorods with an average aspect ratio of 3.7. Scale bar are 100 nm. (e) UV–vis–NIR spectra of the Au–Cu<sub>2</sub>O nanobars.

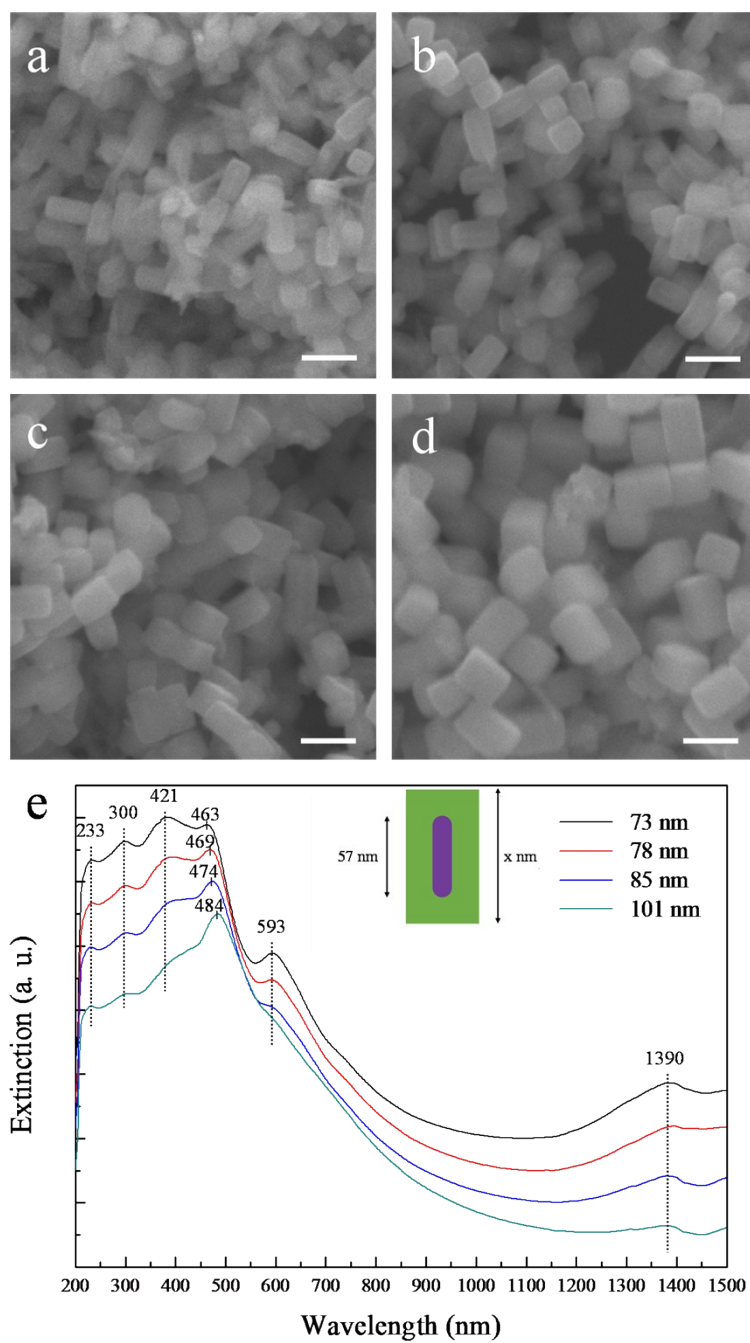

**Fig. S7** (a–d) SEM images of Au–Cu<sub>2</sub>O rectangular nanobars with dimensions of (a) 73 nm × 44 nm, (b) 78 nm × 47 nm, (c) 85 nm × 53 nm, and (d) 101 nm × 67 nm synthesized from Au nanorods with an average aspect ratio of 4.1. Scale bar are 100 nm. (e) UV–vis–NIR spectra of the Au–Cu<sub>2</sub>O nanobars.



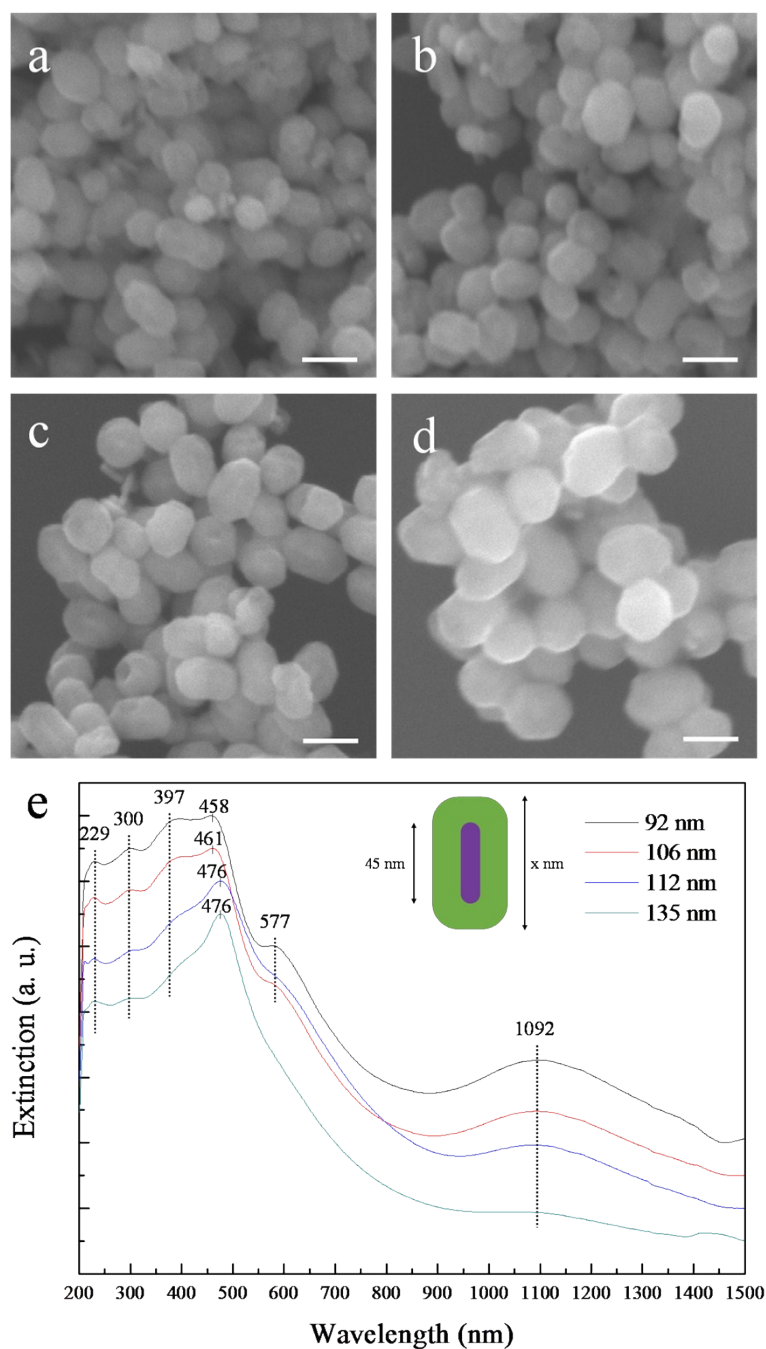

**Fig. S8** (a–d) SEM images of Au–Cu<sub>2</sub>O truncated nanobars with average lengths of (a) 92, (b) 106, (c) 112, and (d) 135 nm grown from Au nanorods with an aspect ratio of 3.5. Scale bar are 100 nm. (e) UV–vis–NIR spectra of the Au–Cu<sub>2</sub>O truncated nanobars.

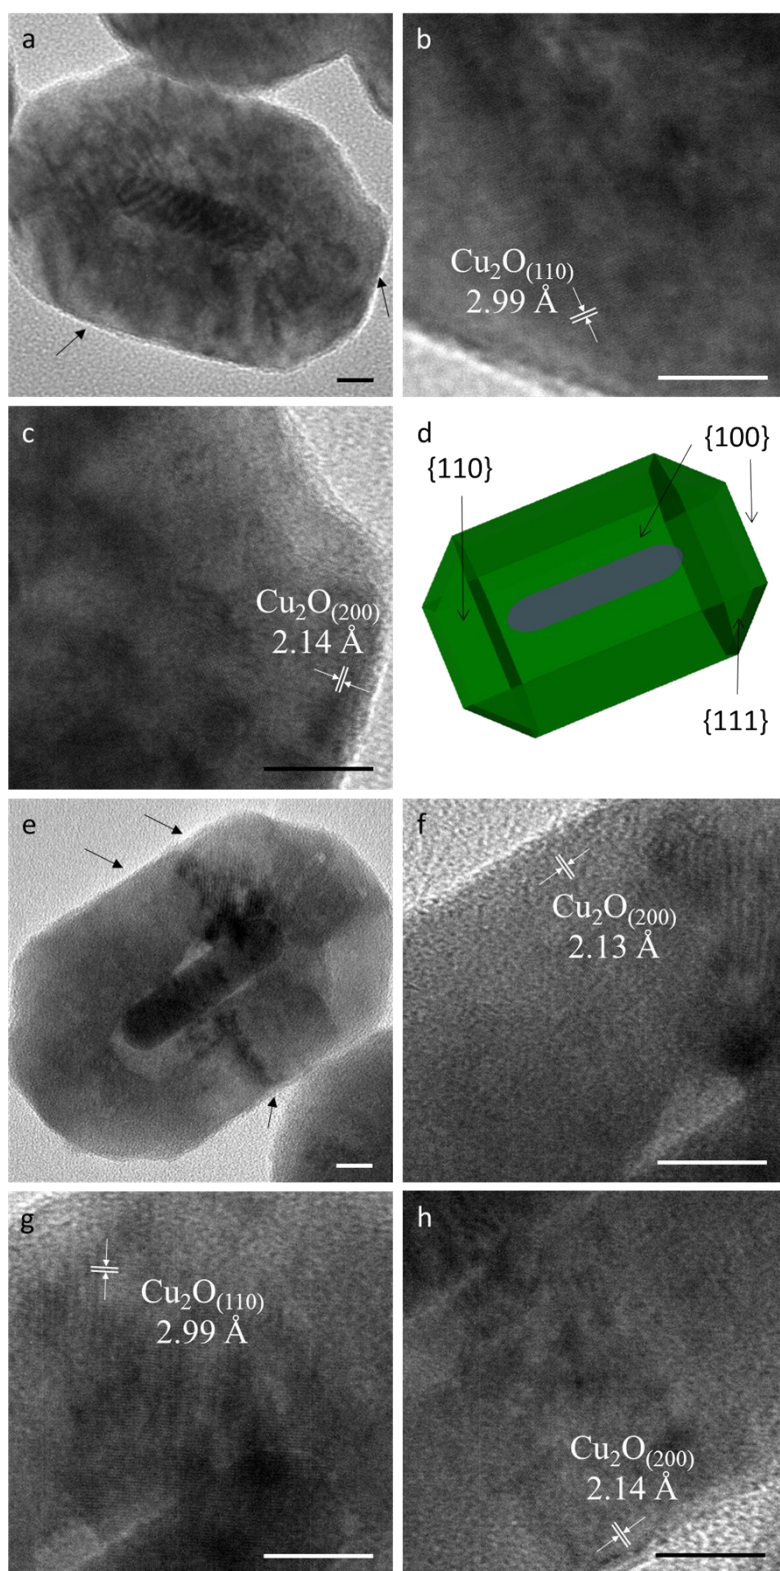

**Fig. S9** (a) TEM image of a Au–Cu<sub>2</sub>O truncated nanobar. (b, c) HR-TEM images of the pointed regions in panel a. (d) Illustration of the particle with its facets marked. (e) TEM image of another Au–Cu<sub>2</sub>O truncated nanobar. (f–h) HR-TEM images of the pointed regions in panel e. Scale bars are equal to 10 nm.

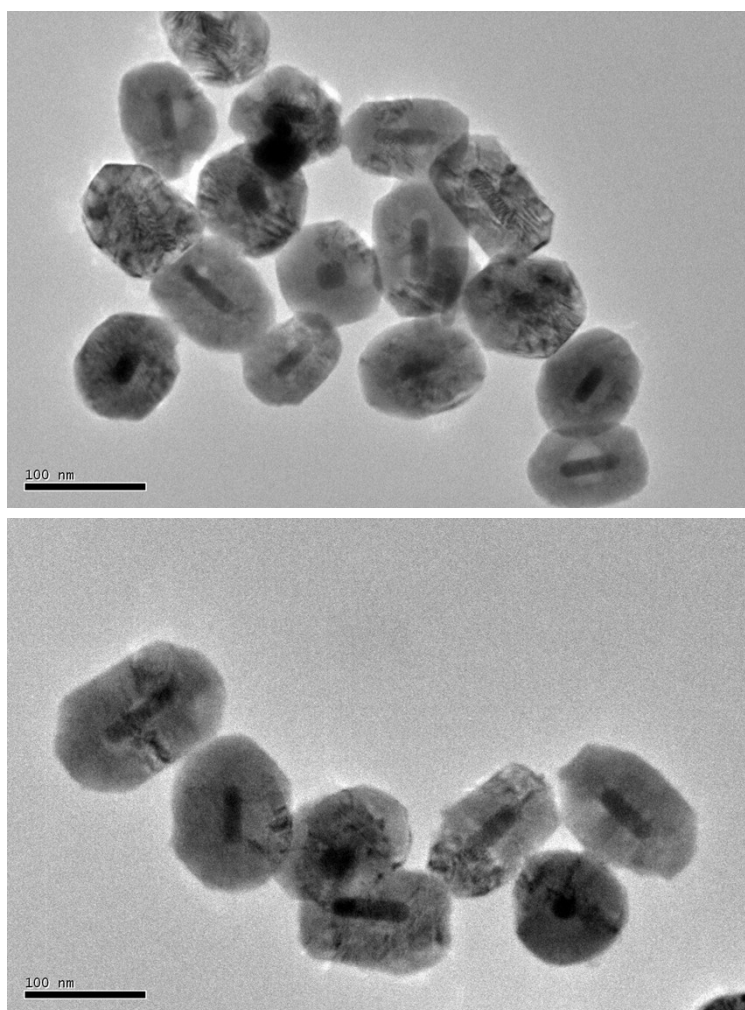

**Fig. S10** Additional TEM images of the Au–Cu<sub>2</sub>O truncated nanobars.

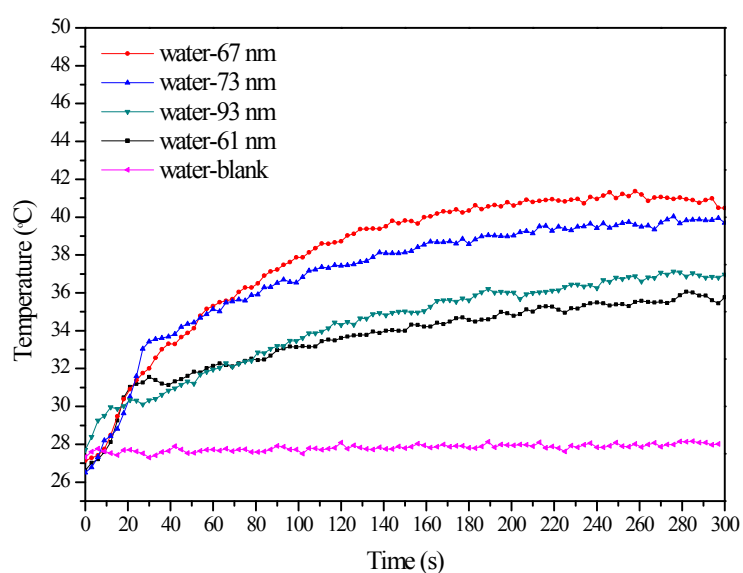

**Fig. S11** Temperature profiles of Au–Cu<sub>2</sub>O nanobars irradiated by a 1064-nm CW laser at a power of 282 mW. The nanobars were dispersed in water. Nanobar lengths are indicated.
